# Supplementary material for: Crystallization of Gd2O3 nanoparticles: evolution of the microstructure via electron-beam manipulation
Source: Royal Society of Chemistry journal article supplement (doi:10.1039/c9nr04097h), 2019-01-01
Supplement: c9nr04097h1.pdf [file c9nr04097h1.pdf]

## Supporting information

### Crystallization of Gd<sub>2</sub>O<sub>3</sub> nanoparticles: evolution of the microstructure *via* electron-beam manipulation

He Li,<sup>a,b</sup> Jiangfeng Li,<sup>b,c</sup> Yunling jia,<sup>b</sup> Fuhui Liao,<sup>b</sup> Yuejiao Xu,<sup>b</sup> Lingdong Sun,<sup>b</sup> Chunhua Yan,<sup>b</sup> Yanting Li,<sup>a\*</sup> Lijian Bie,<sup>c\*</sup> Jing Ju<sup>b\*</sup>

<sup>a</sup>School of Materials Science and Engineering, Hebei Provincial Key Laboratory of Traffic Engineering Materials, Shijiazhuang Tiedao University, Shijiazhuang 050043, China.

<sup>b</sup>College of Chemistry and Molecular Engineering, Peking University, Beijing National Laboratory for Molecular Sciences (BNLMS), Beijing 100871, China.

<sup>c</sup>School of Materials Science and Engineering, Tianjin University of Technology, Tianjin 300384, China.

Table S1. Statistics analyses of amorphous NPs in four areas.

|                                                     | Area 1 | Area 2 | Area 3 | Area 4 |
|-----------------------------------------------------|--------|--------|--------|--------|
| Total No. of NPs                                    | 90     | 73     | 92     | 72     |
| No. of crystalline <i>cubic</i> -NaGdF <sub>4</sub> | 71     | 55     | 70     | 59     |
| No. of amorphous NPs                                | 19     | 18     | 22     | 13     |
| Proportion of amorphous NPs (%)                     | 0.21   | 0.25   | 0.24   | 0.18   |

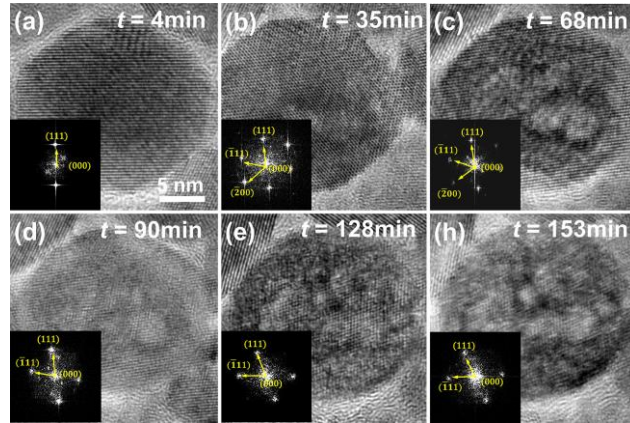

**Fig. S1** Time-resolved structure evolution for **Particle 3**.

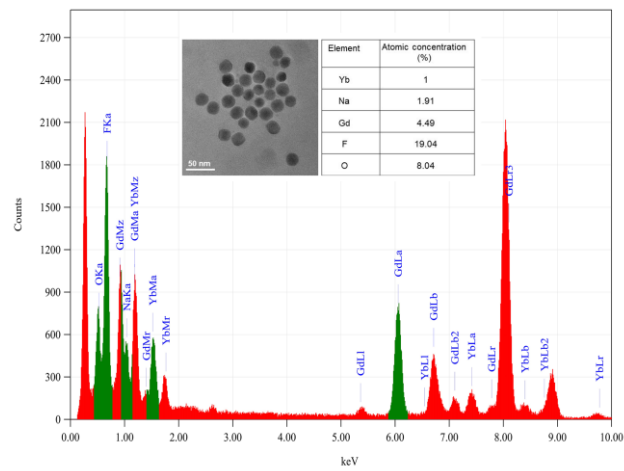

**Fig. S2** EDS spectrum and analysis of as-synthesized  $\text{NaGdF}_4:\text{Yb,Er}$  NPs deposited on Si-based  $\text{SiN}_x$  film.

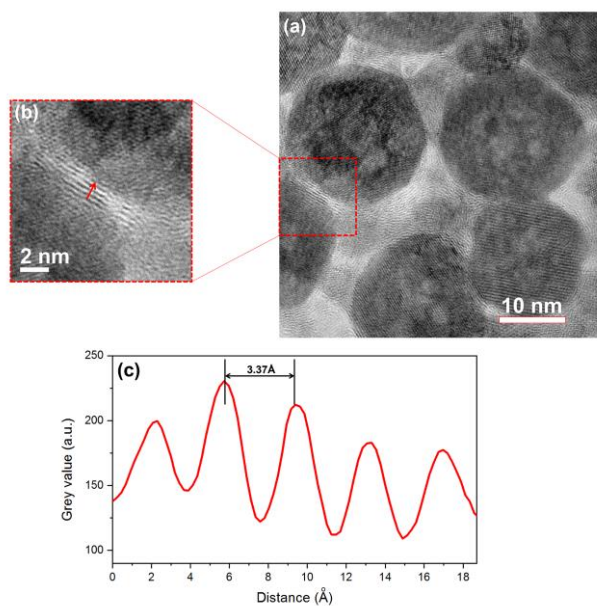

**Fig. S3** (a) Formation of multilayer graphene on the surface of nanoparticles and in their surroundings after *e*-beam irradiation for 112 min. (b) The magnified TEM image of the red dashed square in (a), which shows clearly the lattice fringes of graphene with *d*-spacing of 3.37 Å, corresponding to (0002) plane of graphite. (c) The profile of the line scan of the red arrow in (b), which shows the averaged *d*-spacing is 3.37 Å.

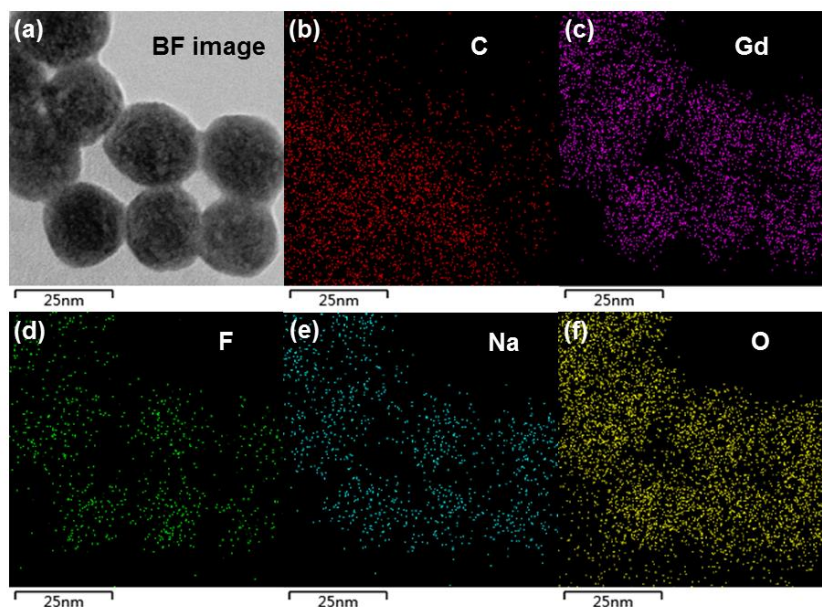

**Fig. S4** STEM-EDS mapping of the NPs after 125 min irradiation with beam current of 60 pA cm<sup>-2</sup>. The sample was deposited on Si-based SiN<sub>x</sub> film to avoid the disturbance of carbon film. The mapping results exhibit the co-existence of C, Gd, Na, F and O atoms,

giving clear evidence of the formation of carbon species.
